# Supplementary material for: Structure of the human TRiC/CCT Subunit 5 associated with hereditary sensory neuropathy
Source: PubMed Central journal article supplement (PMC5473854; doi:10.1038/s41598-017-03825-3), 2017-06-16
Supplement: 41598_2017_3825_MOESM1_ESM.pdf [file 41598_2017_3825_MOESM1_ESM.pdf]

## Supplementary Information

### Structure of the human TRiC/CCT Subunit 5 associated with hereditary sensory neuropathy

Jose H. Pereira<sup>1,2</sup>, Ryan P. McAndrew<sup>1,2</sup>, Oksana A. Sergeeva<sup>3</sup>, Corie Y. Ralston<sup>1,4</sup>,  
Jonathan A. King<sup>3</sup>, Paul D. Adams<sup>1,2,5,\*</sup>

<sup>1</sup>Molecular Biophysics and Integrated Bioimaging Division, Lawrence Berkeley National Laboratory, Berkeley, CA 94720, USA.

<sup>2</sup>Joint BioEnergy Institute, Emeryville, CA 94608, USA.

<sup>3</sup>Biology Department, Massachusetts Institute of Technology, Cambridge, MA 02139, USA.

<sup>4</sup>Berkeley Center for Structural Biology, Lawrence Berkeley National Laboratory, Berkeley, CA 94720, USA

<sup>5</sup>Department of Bioengineering, University of California Berkeley, CA 94720, USA.

#### Index

|                            | Page |
|----------------------------|------|
| <b>Supplementary Fig 1</b> | 2    |
| <b>Supplementary Fig 2</b> | 4    |
| <b>Supplementary Fig 3</b> | 7    |
| <b>Supplementary Fig 4</b> | 8    |
| <b>References</b>          | 8    |

# Supplementary Fig 1

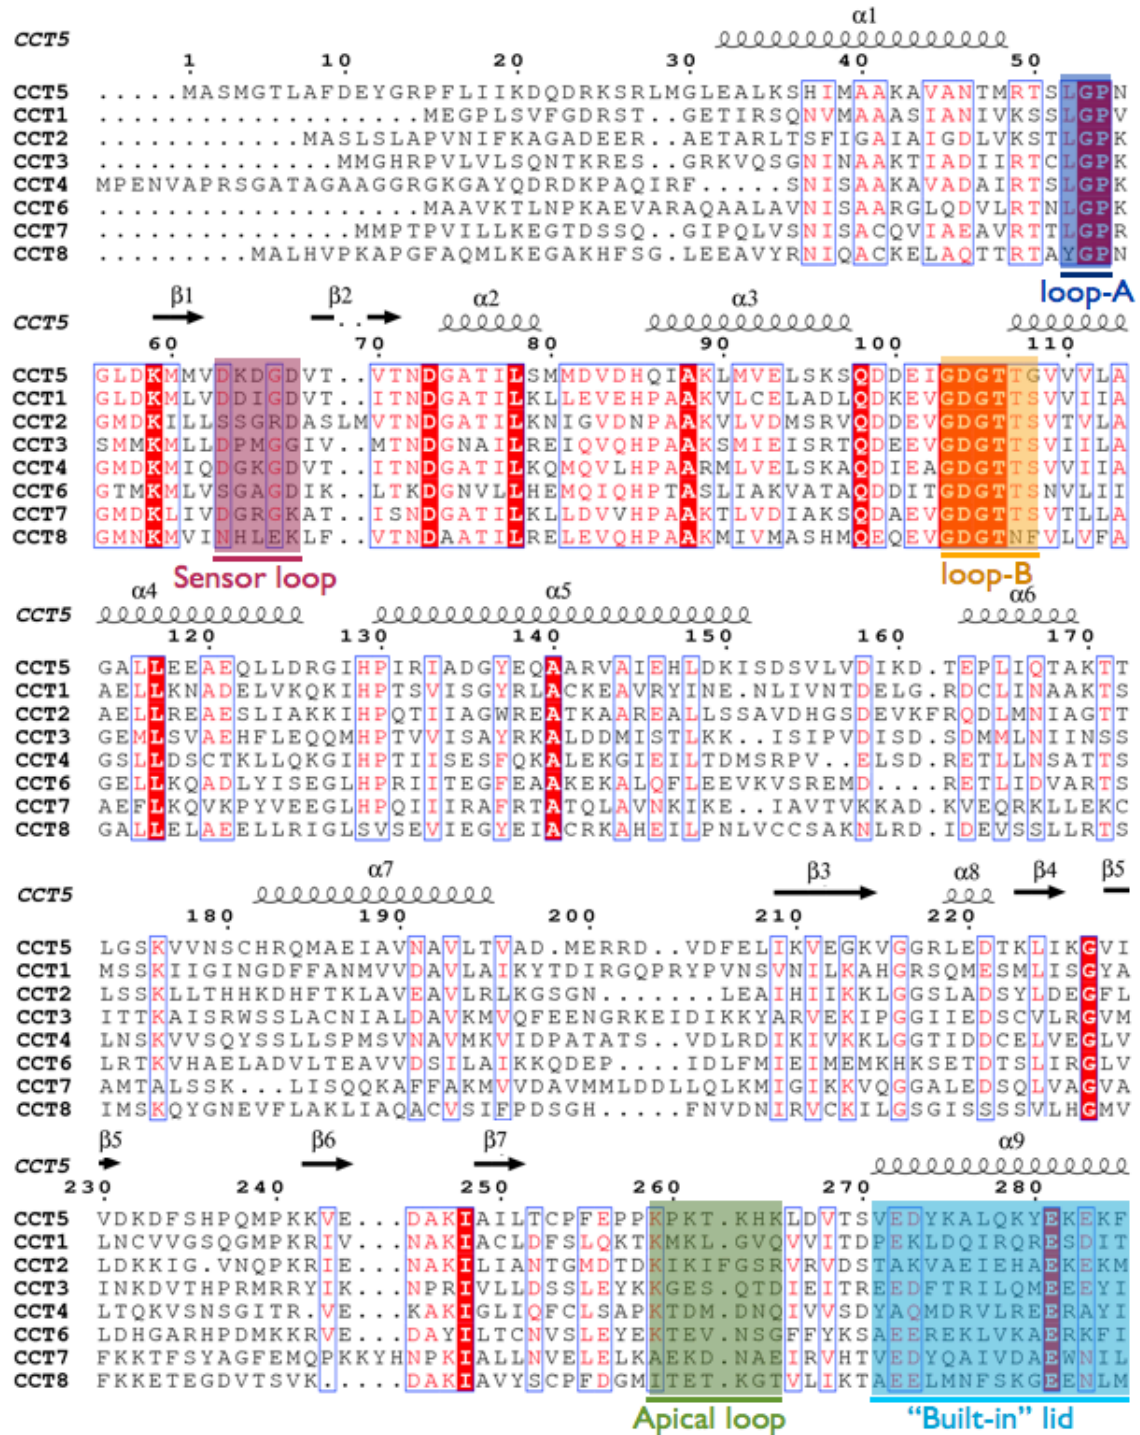

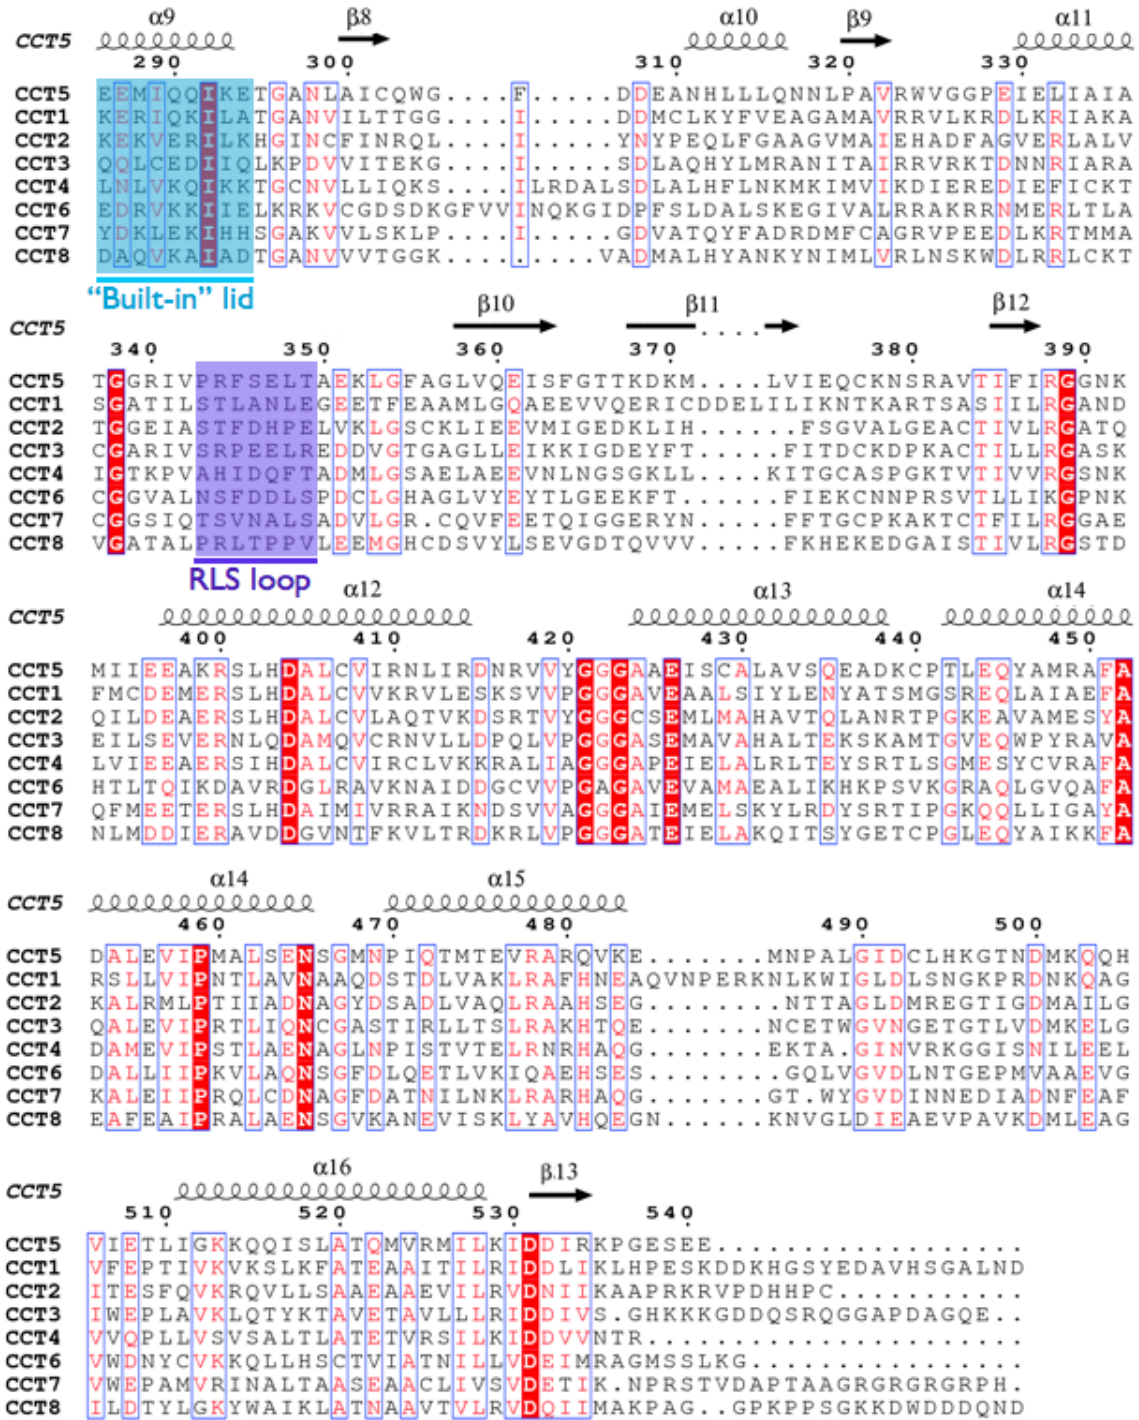

**Supplementary Fig 1** – Sequence alignment of the eight human TRiC/CCT subunits. The secondary structure elements for CCT5 subunit are displayed at the top of the sequence alignment. The nucleotide-binding loop-A and loop-B, the sensor loop, rls-loop and the Apical-loop regions are indicated below the sequences. Figure was made using the program ESPRIPT (Robert & Gouet, 2014).



Supplementary Fig 2

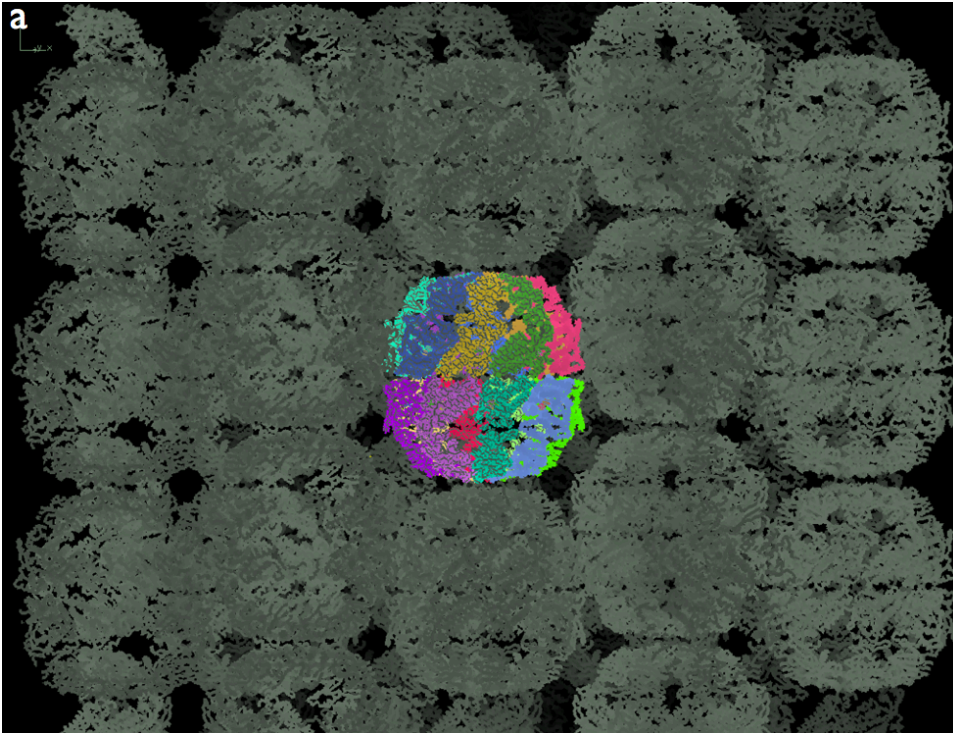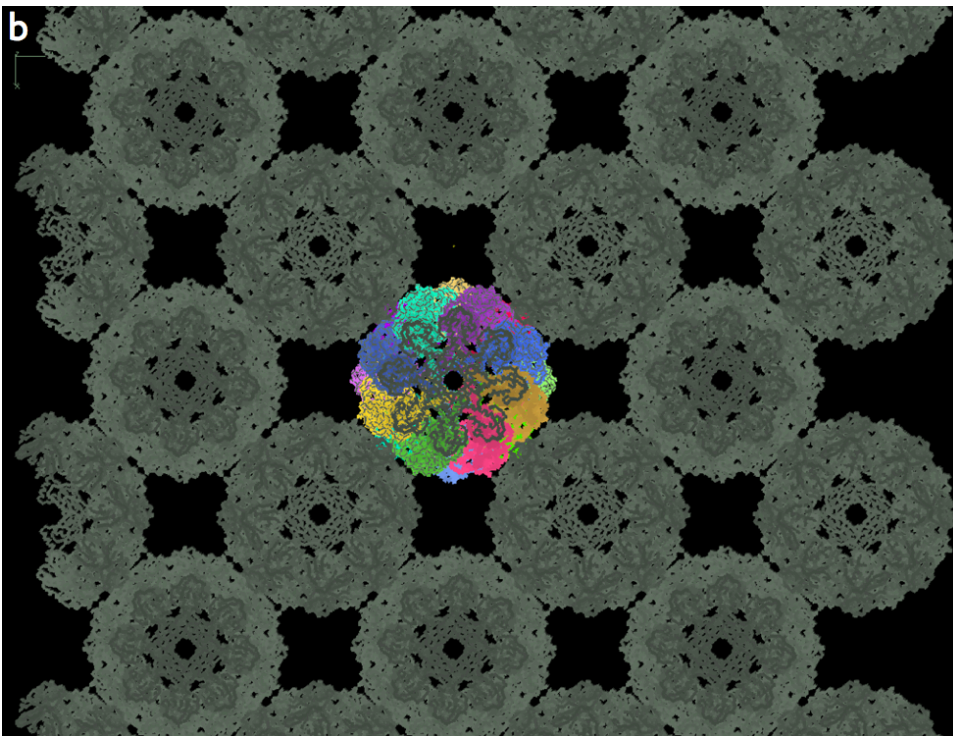

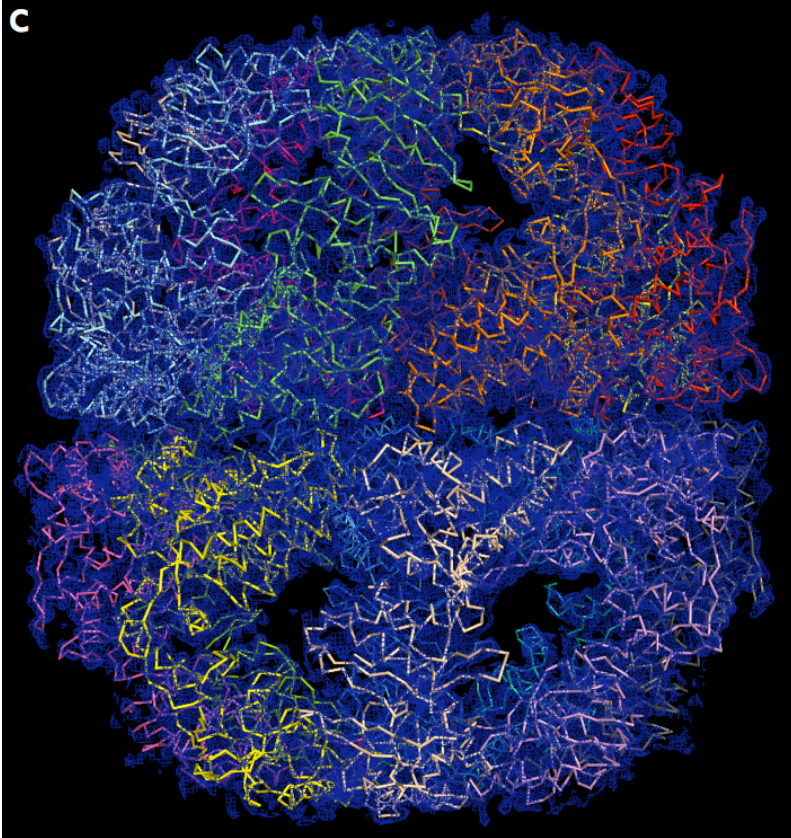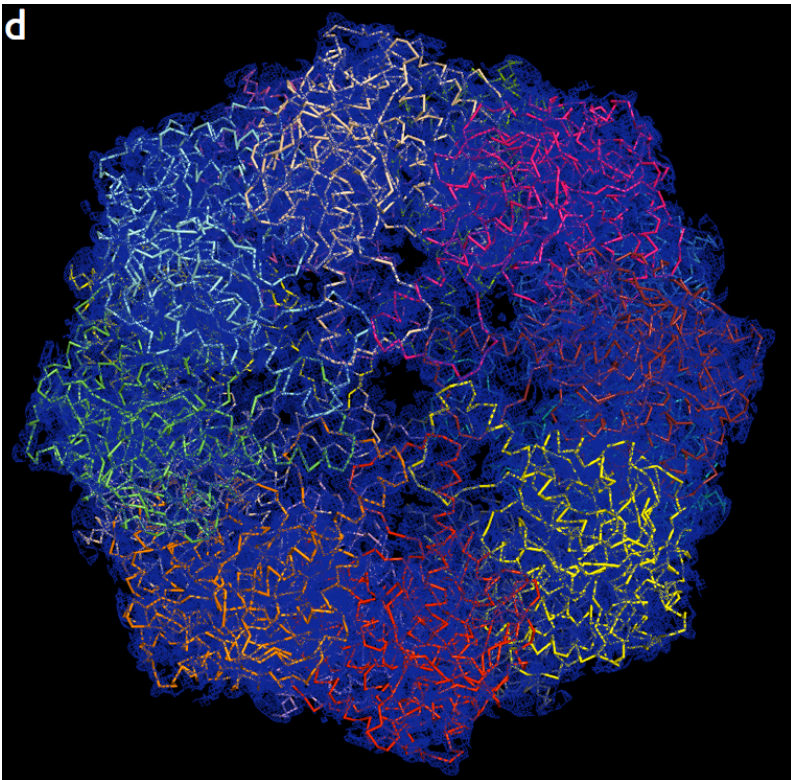



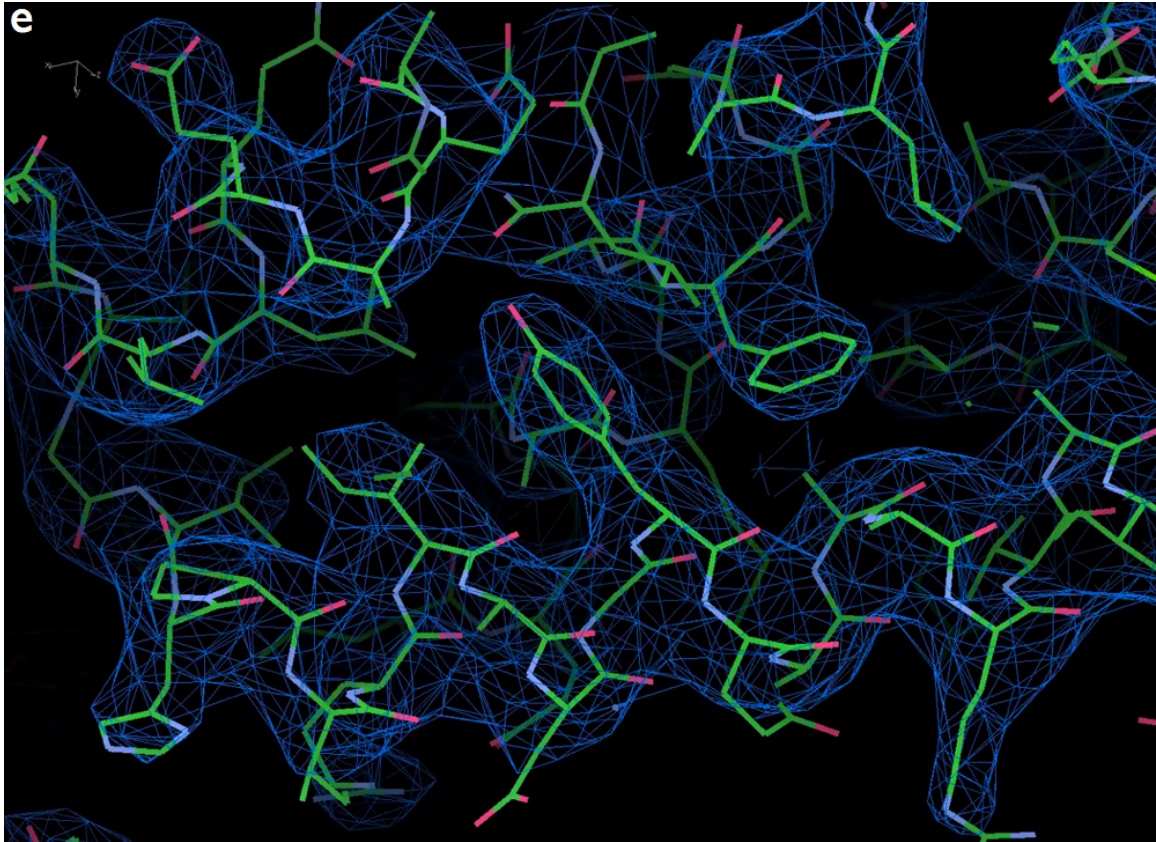

**Supplementary Fig 2** – Crystal structure of the single CCT5 subunit shows the two back-to-back rings of eight subunits each, similar to the hetero-octameric human TRiC arrangement. **a,b)** Crystal packing showing the Side and Top view of CCT5 homo-octameric arrangements. **c,d,e)** Crystal structure of CCT5 solved at 3.5 Å resolution showing the experimental 2mFo-DFc electron density map contoured at 1.0  $\sigma$  (blue) from the side and top view of the CCT5 double octameric rings arrangements and a zoom in at  $\alpha$ -helices regions of equatorial domain, respectively.

### Supplementary Fig 3

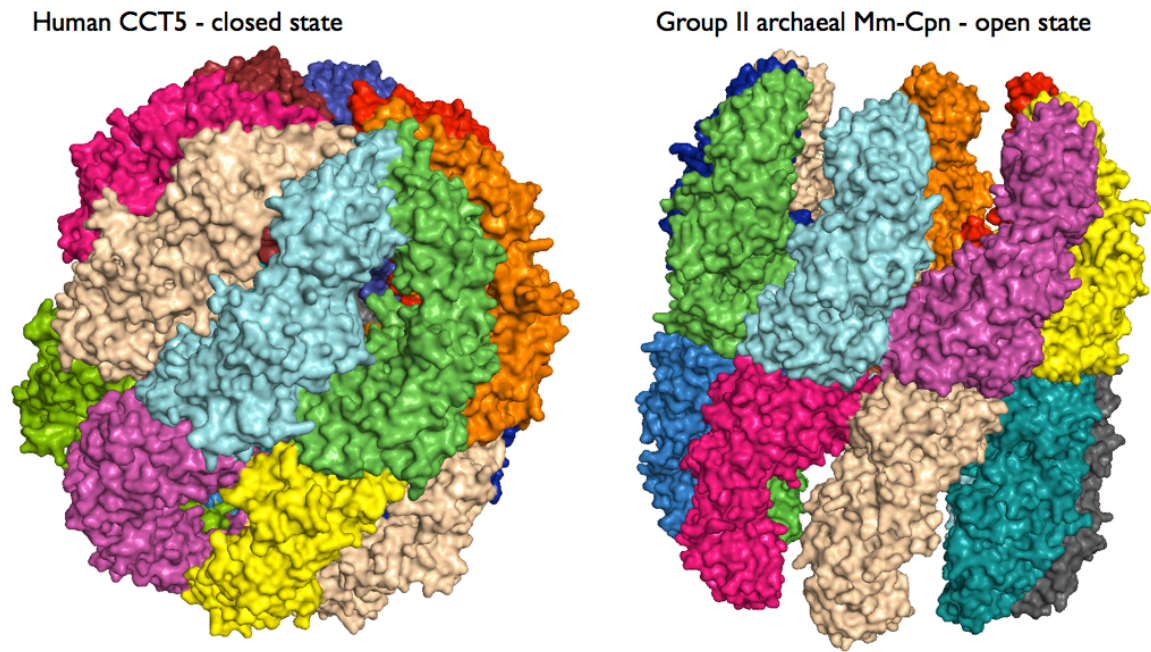

**Supplementary Fig 3** – Homo-octameric double ring back-to-back arrangement of the CCT5 in a closed state and the group II chaperonin from *Methanococcus maripaludis* (Mm-Cpn) in an open state (PDB ID 3KFK) (Pereira *et al.*, 2010). The open state is associated with the peptide acceptor conformation that major conformation change upon the ATP hydrolysis and the chamber is closed to fold the protein substrates.

## Supplementary Fig 4

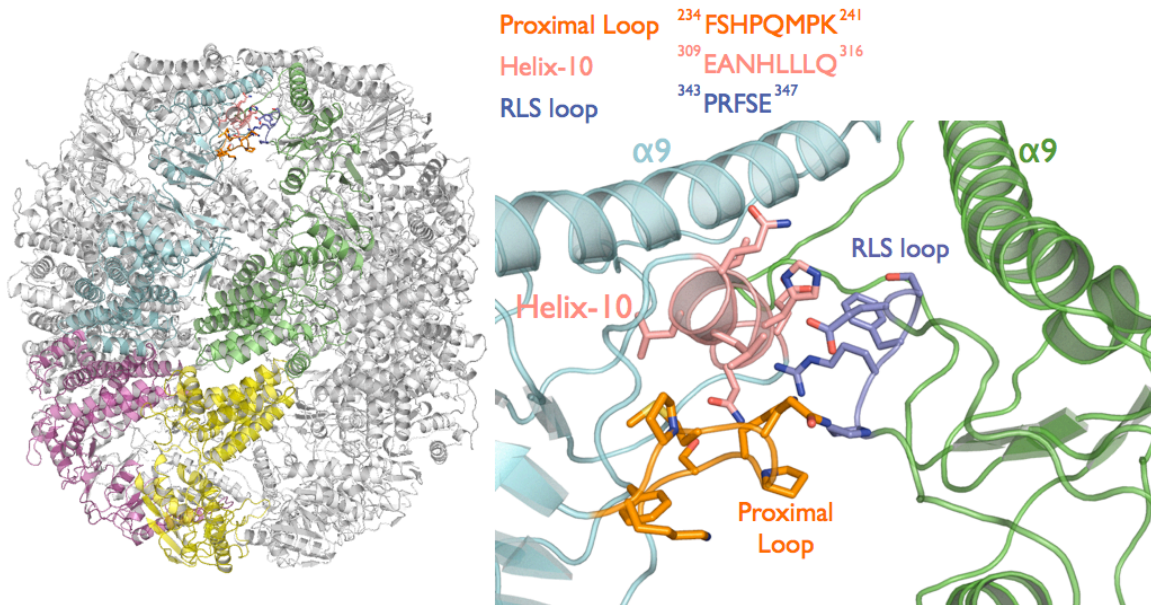

**Supplementary Fig 4** – CCT5 ring arrangement showing substrate-binding site and release loop of substrate loop (rls-loop) contacting each other on the closed state observed for CCT5 in complex with ADP. Ring picture and a zoom in showing proximal loop (orange) and helix-10 (pink) of CCT5 subunit contacting the rls-loop (blue) from adjacent subunit at apical domain region of the ring.

## References

Robert, X. & Gouet, P. Deciphering key features in protein structures with the new ENDscript server. *Nucl. Acids Res.* **42**, 320-324 (2014).

Pereira J.H. *et al.* Crystal structures of a group II chaperonin reveal the open and closed states associated with the protein folding cycle. *J. Biol. Chem.* **285**, 27958-27966 (2010).
